# Supplementary material for: Politeness in Human-Robot Interaction: A Multi-Experiment Study with Non-Humanoid Robots
Source: Research Square preprint supplement (doi:10.21203/rs.3.rs-995480/v1), 2022-03-15
Supplement: Supplementary file 1 [file b0af3085de0224c88d74663a.docx]

**Appendix - Questionnaires used in the experiment**

**Post-trial Questionnaire (A)**

To what extent do you agree with the following statements regarding the interaction with the robot in this scenario? (1-5)

1 represents “strongly disagree” and 5 represents “strongly agree”

1. The interaction with the robot was enjoyable. [Enjoyment]
2. During the experiment, I felt that I could rely on the robot. [Trust]
3. During the experiment, I felt that the robot considers my desires. [Satisfaction]
4. During the experiment, I felt that the robot was sociable. [Enjoyment]
5. During the experiment, I felt comfortable with the robot. [Trust]
6. The interaction with the robot was irritating. [Enjoyment, reverse coding]
7. During the experiment, I felt that the robot gave me choices for setting the table. [Satisfaction]
8. Imagine yourself in future when you are required to set a table every day during the week. How much would you like to use the robot in this task? [Satisfaction]

**Post-trial Questionnaire (B)**

To what extent do you agree with the following statements regarding the interaction with the robot in this scenario? (1-5)

1 represents “strongly disagree” and 5 represents “strongly agree”

1. The interaction with the robot was enjoyable [Enjoyment]
2. I felt the robot could be trusted [Trust]
3. I think that people who will be assisted by the robot will enjoy this interaction [Enjoyment]
4. For this question please select number 2 [Instructional manipulation check]
5. People can trust the robot [Trust]
6. I am satisfied with the way the robot communicated with me [Satisfaction]

**Final Questionnaire**

1. Did you feel a difference between the scenarios? Yes / No

If so, what was the difference?

1. How would you like the robot to set the table for you? Green/ Blue/ Red
2. How would you not want the robot to set the table for you? Green/ Blue/ Red
3. In what scenario would you say that the robot was the most polite? Green/ Blue/ Red
4. In what scenario would you say that the robot was the least polite? Green/ Blue/ Red

Items in A were used in the live experiment of young adults and old adults’ manipulator

Items in B were used for the rest of the experimental groups.
